# Supplementary material for: Role of chemokine-mediated angiogenesis in resistance towards crizotinib and its reversal by anlotinib in EML4-ALK positive NSCLC
Source: Springer Nature journal article supplement (doi:10.1186/s12967-022-03451-2), 2022-05-31

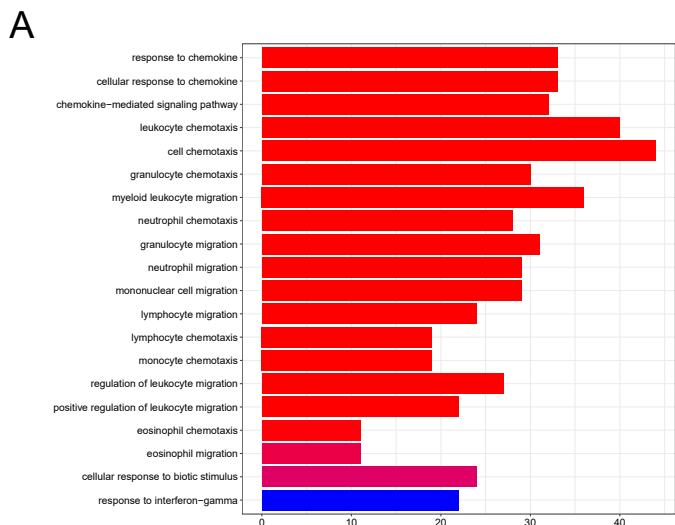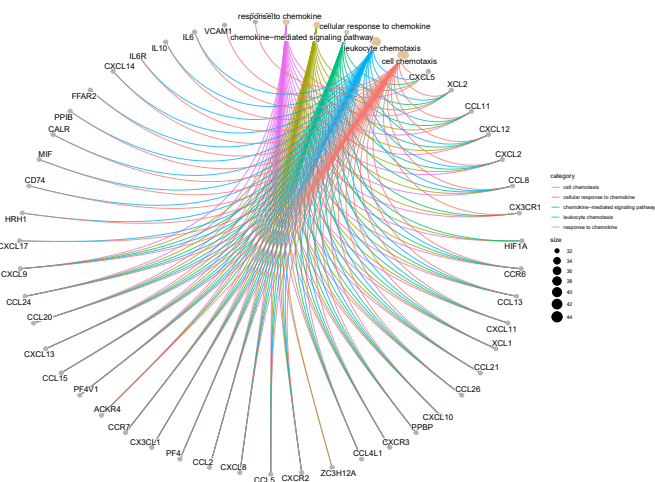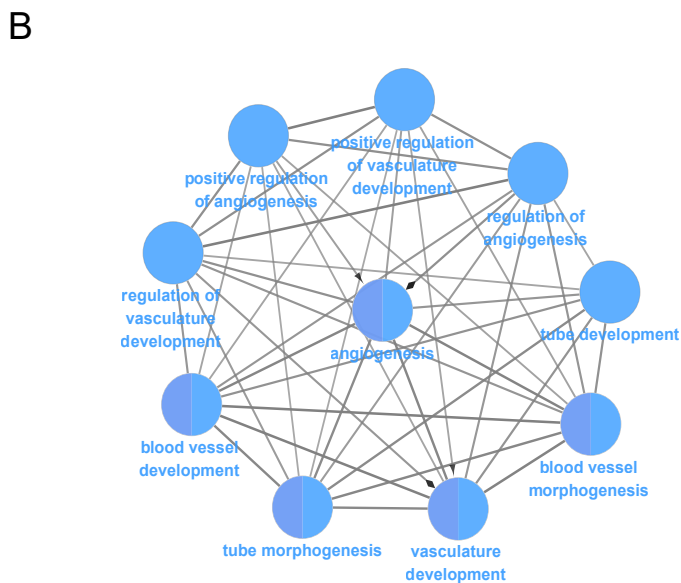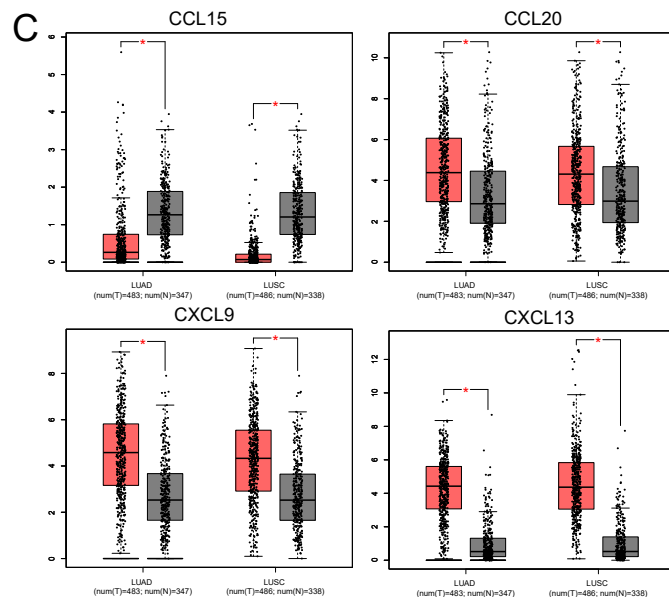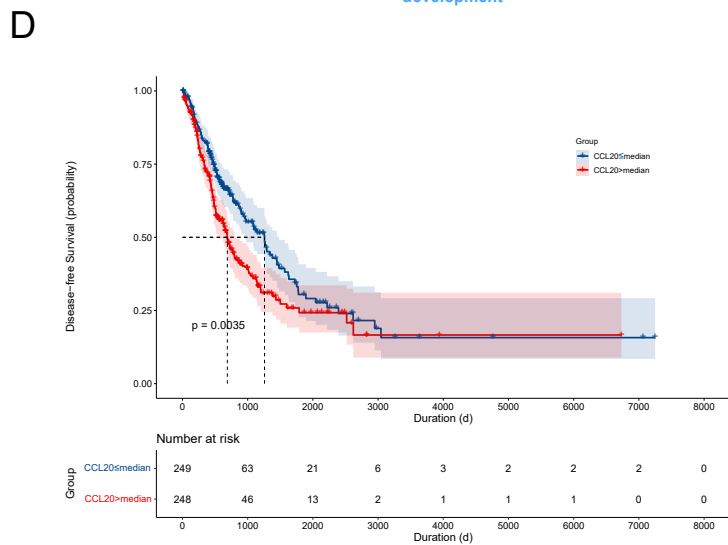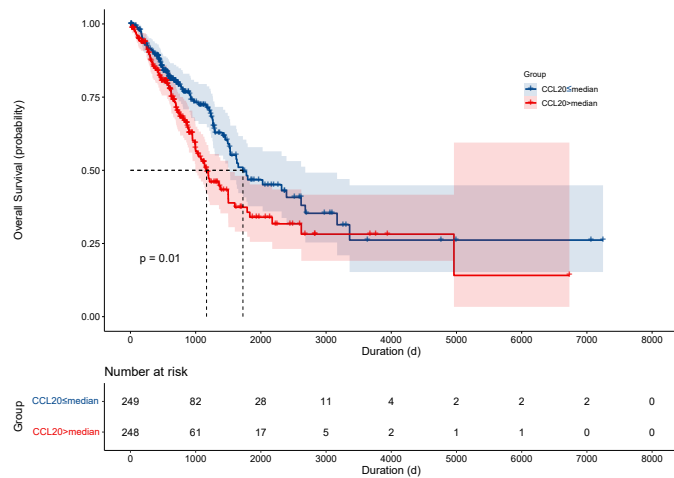

Supplement: MOESM3 [file 23112656]
